# Supplementary material for: DIAPH3 deficiency links microtubules to mitotic errors, defective neurogenesis, and brain dysfunction
Source: eLife. 2021 Apr 26;10:e61974. doi: 10.7554/eLife.61974 (PMC8102060; doi:10.7554/eLife.61974)
Supplement: Figure 1—figure supplement 1—source data 1. [file elife-61974-fig1-figsupp1-data1.xlsx]

## Sheet: Supp Figure S1A-C
Supplementary Figure S1
Supplementary Figure S1A
	Scrambled-shRNA	sh-DIAPH3	sh-DIAPH3+SPAG5
	100	58.7543	83.8881
	100	60.4765	89.6613
	100	58.0246	87.8715
mean	100	59.0851	87.1403
Supplementary Figure S1B
	Scrambled-shRNA	sh-DIAPH3	sh-DIAPH3+SPAG5
	1.33343	2.8372	1.15298
	1.07141	3.35917	1.31611
	0.921825	3.25367	0.807381
mean	1.10889	3.15001	1.09216
Supplementary Figure S1C
	Scrambled-shRNA	sh-DIAPH3
	91.2102	90.4971
	95.646	97.302
	95.477	98.6682
mean	94.1111	95.4891
