# Supplementary material for: DIAPH3 deficiency links microtubules to mitotic errors, defective neurogenesis, and brain dysfunction
Source: eLife. 2021 Apr 26;10:e61974. doi: 10.7554/eLife.61974 (PMC8102060; doi:10.7554/eLife.61974)
Supplement: Figure 1—source data 1. [file elife-61974-fig1-data1.xlsx]

## Sheet: Figure 1F
Figure 1F
	anti-Diaph3				mean
Scrambled-shRNA	1	1	1		1
sh-DIAPH3	0.161173	0.300268	0.221674		0.227705
sh-SPAG5	0.164999	0.328619	0.266569		0.253396
	anti-Spag5
Scrambled-shRNA	1	1	1		1
sh-DIAPH3	0.23646	0.362797	0.31359		0.304282
sh-SPAG5	0.184849	0.212633	0.240533		0.212671

## Sheet: Figure 1K
Figure 1K
	Normal	Abnormal	Total no. of cells	% normal	% abnormal
scrambled-shRNA	113	5	118	95.7627	4.23729
sh-Diaph3	21	94	115	18.2609	81.7391

## Sheet: Figure 1N
Figure 1N
scrambled-shRNA	sh-Diaph3		mean
34.9452	22.9981		32.427	16.9089
28.9813	22.3304
33.9871	25.2107
50.0369	27.8071
41.7978	24.3105
22.605	25.8742
29.4178	11.6854
35.5615	14.4068
30.3606	13.6381
41.6219	10.0138
35.909	8.15077
23.1936	17.8055
30.4512	11.5213
23.9705	12.4939
21.5965	18.0564
30.8102	2.05249
25.2663	10.8269
33.2354	8.89717
29.0871	18.6271
33.5082	24.0922
54.6223	18.1031
23.3492	14.5462
26.45	25.6337
39.0644	13.1883
25.5658	15.8845
34.3835	0.260541
31.1514	7.28671
34.046	38.5382
33.0084	20.0698
35.1835	10.8512
31.5058	15.7
34.2636	27.7069
38.8526	26.1447
26.8864	16.3091
24.7109	22.8509
18.0423	26.2283
20.1409	14.8325
31.042	20.5852
40.6369	25.9759
26.6586	10.1715
25.3591	32.5922
34.5392	32.4291
38.7485	5.2967
28.4926	29.0085
29.5133	33.664
38.2783	17.1898
26.5258	36.6482
34.8078	17.4697
16.6819	4.90591
22.6891	0.063771
21.3742	0.0238942
30.8071	19.608
31.3027	21.9137
48.3636	1.33944
51.1316	10.8483
37.1953	0.415958
29.6423	25.321
35.9863	17.3683
19.6491	11.7921
33.7676	1.54535
26.5186	6.99724
39.3909	21.6558
22.0605	26.9056
29.1322	6.50321
28.7234	11.1152
35.5642	17.0642
21.1432	17.2677
36.9978	39.1027
32.6189	11.8779
35.1467	24.8252
47.453	25.2776
45.9568	5.55992
35.4065	18.1383
33.8973	19.5656
41.0324	21.8065
35.5925	12.863
24.9522	3.46211
34.4221	25.8617
35.7705	24.7217
32.6239	11.9698
40.2063	21.8853
18.1632	30.7105
35.5689	13.978
25.6853	15.6613
33.8562	13.2282
27.6417	17.9648
38.9573	19.7718
27.2304	4.3823
34.5705	16.2816
40.1734	1.61788
41.397	21.4285
28.1411	21.9864
31.3506	17.2635
36.4164	16.39
27.8099	12.0468
30.081	11.9486
39.7794	15.1822
42.3138	19.9364
46.7787	11.3793
41.215	15.8689
30.2426	10.9265
18.6505	20.7301
35.3396	28.8145
35.2026	16.0967
22.2753	26.2956
37.8341	11.929
29.5104	0.270237
38.0564	19.0094
31.6485	20.4178
40.1792	0.13406
34.9076	17.8006
21.8418	12.834
26.0623	32.8826
