# Supplementary material for: DIAPH3 deficiency links microtubules to mitotic errors, defective neurogenesis, and brain dysfunction
Source: eLife. 2021 Apr 26;10:e61974. doi: 10.7554/eLife.61974 (PMC8102060; doi:10.7554/eLife.61974)
Supplement: Figure 2—source data 1. [file elife-61974-fig2-data1.xlsx]

## Sheet: Figure 2B
Figure 2B
	% of protein expression cKO/ctrl (normalized to GAPDH)					mean	sem		% change
Dynein	41.0264	93.1909	70.2373	63.7435		67.0495	10.7303		-32.9505
NUMA	100.006	90.056	56.4252	50.0218		74.1273	12.3081		-25.8727
CENPA	54.2983	89.3003	20.6343	26.6263		47.7148	15.6811		-52.2852
KNSTRN	14.2947	89.0967	47.9114	25.5079		44.2027	16.5157		-55.7973
NUMB	37.9905	71.5296	75.8629	69.5435		63.7316	8.6812		-36.2684
Dynactin	59.2618	91.9992	81.6752	82.5387		78.8687	6.94135		-21.1313
GPSM2	45.0406	47.7514	61.8731	59.4477		53.5282	4.18418		-46.4718
CLASP1	79.295	92.6927	87.3527	96.8902		89.0576	3.79448		-10.9424
INSC	30.9633	91.5247	80.1061	83.3844		71.4946	13.722		-28.5054
PAR3	28.862	62.614	71.9788	69.7553		58.3025	10.0147		-41.6975
SPAG5	34.243	84.5025	71.149	61.5612		62.8639	10.6369		-37.1361

## Sheet: Figure 2I
Figure 2I
	Ctrl	Diaph3 cKO
	2.13235	0.98556
	2.2753	0.356186
	1.95775	0.0506702
average	2.1218	0.464138
