# Supplementary material for: DIAPH3 deficiency links microtubules to mitotic errors, defective neurogenesis, and brain dysfunction
Source: eLife. 2021 Apr 26;10:e61974. doi: 10.7554/eLife.61974 (PMC8102060; doi:10.7554/eLife.61974)
Supplement: Figure 3—source data 1. [file elife-61974-fig3-data1.xlsx]

## Sheet: Figure 3F
Figure 3F
	Scrambled-shRNA	sh-SPAG5
	1	0.150951
	1	0.119039
	1	0.245825
mean	1	0.171938
		1.32225e-05

## Sheet: Figure 3L
Figure 3L
Scrambled-shRNA	sh-SPAG5
0.117	1.579
1.775	1.661
1.986	2.917
2.179	3.305
2.364	3.402
2.4	3.945
2.426	3.991
2.65	4.779
2.786	4.911
3.007	5.181
3.249	5.218
3.333	5.273
3.879	5.337
3.882	5.411
3.883	6.172
3.978	6.41
4.013	6.427
4.048	6.534
4.096	6.836
4.142	7.264
4.309	7.339
4.313	7.363
4.516	8.408
4.635	8.592
4.635	8.756
4.668	8.929
4.717	9.287
4.767	10.186
4.8	10.226
4.97	10.363
5.177	10.413
5.37	11.642
5.489	12.105
5.498	12.192
5.572	12.924
5.606	14.265
5.866	14.336
5.868	14.582
5.905	14.838
6.199	14.919
6.43	16.159
6.481	16.768
6.862	18.129
6.876	18.624
7.094	18.731
7.353	18.828
7.58	19.612
7.748	19.813
8.053	20.218
8.385	20.336
8.453	20.547
8.504	20.867
8.68	21.143
9.279	21.992
9.298	22.188
9.462	22.53
9.527	23.061
9.866	23.3
9.917	23.826
9.987	24.992
10.055	25.705
10.125	26.066
10.258	26.231
10.269	27.306
10.38	28.28
10.394	28.536
10.461	28.636
10.532	28.862
10.627	29.035
10.913	29.608
11.052	30.472
11.097	31.706
11.465	32.48
11.627	33.024
11.761	33.069
11.768	33.074
12.228	33.412
13.664	33.792
13.821	34.233
14.805	34.513
15.837	34.71
15.895	35.607
16.448	36.4
16.64	37.345
18.754	37.482
20.056	39.017
20.09	39.705
20.709	40.419
20.921	41.297
21.815	42.413
22.244	44.31
22.797	44.489
23.607	44.899
24.814	45.124
26.209	45.846
26.225	46.794
27.087	47.07
27.252	47.5
27.33	48.518
27.623	50.405
28.422	51.394
28.902	52.149
30.581	52.188
32.107	53.728
32.526	55.673
34.318	56.802
35.216	57.095
38.835	58.294
42.041	59.036
42.863	60.573
46.132	61.048
49.587	61.418
55.687	63.435
55.801	65.515
56.437	65.72
56.895	67.249
62.848	68.471
63.589	68.728
63.845	69.28
64.364	70.713
69.348	70.907
69.498	71.019
71.068	72.453
72.367	73.514
72.541	74.668
74.164	74.946
75.139	75.363
75.774	75.75
76.596	76.897
76.803	78.161
77.264	78.422
77.447	81.734
78.365	82.675
80.023	84
80.798	86.991
81.275	87.785
82.361	88.363
82.441
82.514
83.214
84.198
84.285
85.009
86.128
86.719
88.707
88.854

## Sheet: Figure 3M
Figure 3M
	Planar	Non-planar	Total	%	%
scramble-shRNA	102	45	147	69.3878	30.6122
sh-SPAG5	70	67	137	51.0949	48.9051
