# Supplementary material for: DIAPH3 deficiency links microtubules to mitotic errors, defective neurogenesis, and brain dysfunction
Source: eLife. 2021 Apr 26;10:e61974. doi: 10.7554/eLife.61974 (PMC8102060; doi:10.7554/eLife.61974)
Supplement: Figure 4—figure supplement 1—source data 1. [file elife-61974-fig4-figsupp1-data1.xlsx]

## Sheet: Supp Figure S4
Supplemantary Figure S4
	Ctrl	cKO
	1.54659	19.2308
	1.28376	18.5185
	2.39044	19.9029
	2.10728	21.2034
	0.207469	19.3029
	3.92308	12.4014
	6.51912	17.6647
	3.4642	17.9738
	1.21951	16.8399
mean	2.51794	18.1154
	0.629761	0.83373
