# Supplementary material for: DIAPH3 deficiency links microtubules to mitotic errors, defective neurogenesis, and brain dysfunction
Source: eLife. 2021 Apr 26;10:e61974. doi: 10.7554/eLife.61974 (PMC8102060; doi:10.7554/eLife.61974)
Supplement: Figure 4—source data 1. [file elife-61974-fig4-data1.xlsx]

## Sheet: Figure 4C,F,I
Figure 4C, F, I
Figure 4C	Pax6
	Ctrl	cKO
	752	406
	751	553
	855	546
mean	786	501.667
Figure 4F	Tbr2
	Ctrl	cKO
	360	227
	349	231
	309	243
mean	339.333	233.667
Figure 4I	Tbr1
	Ctrl	cKO
	560	424
	510	406
	502	382
mean	524	404

## Sheet: Figure 4K
Ctrl	cKO
1.734	7.956
1.892	8.962
3.73	13.654
13.314	20.283
2.379	23.12
12.487	24.818
22.694	28.054
3.148	26.179
6.497	10.259
10.783	25.649
16.913	30.901
1.087	39.701
9.654	39.915
5.382	41.906
18.201	42.955
20.193	54.665
13.113	55.439
2.973	56.217
16.389	59.78
16.448	60.499
16.741	64.279
49.599	66.12
57.641	88.679
3.073	69.474
3.328	72.947
5.511	6.08
5.85	7.775
21.097	8.562
3.019	10.692
11.649	12.511
5.0987	16.546
10.63	17.416
1.693	20.407
4.118	24.653
6.102	25.373
1.033	29.34
0.397	32.37
3.556	41.043
7.098	49.852
18.559	58.354
8.401	61.762
8.598	64.929
9.175	73.519
12.89	3.659
14.265	4.289
19.302	4.367
21.171	4.63
24.793	5.072
27.754	5.464
68.281	8.337
79.984	11.46
0.427	12.078
2.283	13.087
2.558	13.394
2.604	18.743
2.844	24.557
3.497	26.608
4.143	26.761
5.004	28.558
6.639	32.749
6.729	35.045
6.843	35.289
6.915	39.271
7.585	41.976
8.139	47.425
8.334	48.858
8.811	50.145
9.332	52.856
9.856	53.802
10.963	56.543
13.918	57.71
14.262	59.697
14.328	64.092
14.393	69.764
18.769	73.253
19.374	76.022
19.855	80.214
21.448	82.51
21.93	84.164
23.22	86.57
29.427	88.122
37.979
41.434
63.077
65.283
69.299
70.447
73.33
76.43

## Sheet: Figure 4L
Figure 4
Figure 4L
Ctrl
	Planar	Non-planar
count	77	12	89
%	86.5169	13.4831
cKO
	Planar	Non-planar
count	37	44	81
%	45.679	54.321

## Sheet: Figure 4P-S
Figure 4P-S
Figure 4P
	Ctrl	cKO
	57.8723	47.8873
	52.1348	47.4041
	57.6172	47.3098
mean	55.8748	47.5337
Figure 4Q
	Ctrl	cKO
	42.1277	52.1127
	47.8652	52.5959
	42.3828	52.6902
mean	44.1252	52.4663
Figure 4R
	Ctrl	cKO
	0.72794	1.08824
	0.9181	1.10952
	0.73559	1.11373
mean	0.793877	1.10383
Figure 4S
	Ctrl	cKO
	3.82979	4.22535
	3.82023	4.51467
	3.71094	4.45269
mean	3.78698	4.39757
