# Supplementary material for: DIAPH3 deficiency links microtubules to mitotic errors, defective neurogenesis, and brain dysfunction
Source: eLife. 2021 Apr 26;10:e61974. doi: 10.7554/eLife.61974 (PMC8102060; doi:10.7554/eLife.61974)
Supplement: Figure 5—figure supplement 1—source data 1. [file elife-61974-fig5-figsupp1-data1.xlsx]

## Sheet: 工作表1
Supplementary Figure S5
Supplementary Figure S5A
Open field test
	Ctrl	cKO
	958.8	972.72
	1073.04	1041.36
	911.52	1059.84
	903.36	1091.52
	922.08	942.96
	878.64	940.56
	877.92	1018.8
	1031.52	1092.96
	1046.64	944.16
	951.36	923.52
mean	955.488	1002.84
Supplementary Figure S5B
Elevated plus maze
	Ctrl	cKO
	227.76	266.4
	196.56	238.56
	210.96	124.32
	154.56	141.6
	184.32	228.72
	174.96	258
	33.12	78
	98.88	35.76
	76.56	65.76
	63.84	97.44
mean	142.152	153.456
Supplementary Figure S5C
Food localization test
	Ctrl	cKO
	40	73
	90	75
	168	52
	46	20
	33	19
	137	76
	19	121
	159	36
	51	25
	116	55
mean	85.9	55.2
Supplementary Figure S5D
Water maze
	Ctrl					cKO
day	1	2	3	4		1	2	3	4
	41.6667	32.6667	9	28.6667		32	9	5.66667	6.33333
	47.6667	20.3333	9.33333	9		45	60	48.3333	18.3333
	29.6667	30	15.3333	16.6667		53.3333	30.6667	30.3333	26
	38	6.66667	18.6667	5.33333		47.3333	25	16.3333	11.6667
	31.3333	49.6667	44	13.3333		35.6667	32.3333	10.6667	9
	59.6667	18.3333	45.6667	9.33333		60	30.3333	13	24.6667
	24.6667	28.3333	11.6667	7		62.6667	65	45.3333	30
	47.6667	7.33333	4	4		39	31.6667	17	12.6667
	46.3333	49.6667	38.6667	45.6667		34.3333	13	7	10.3333
	43.1333	34	23	17		43	16.6667	12.3333	13
mean	40.98	27.7	21.9333	15.6		45.2333	31.3667	20.6	16.2
Supplementary Figure S5E
Modified Y-maze
	Ctrl	cKO
	130.32	123.12
	141.84	123.6
	98.16	168.48
	88.32	170.88
	124.75	118.96
	72.53	84.73
	105.46	129.32
	176.91	179.12
	91.02	162.3
	119.32	173.58
mean	114.863	143.409
Supplementary Figure S5F
Self-grooming
	Ctrl	cKO
	183	87
	115	210
	124	87
	105	105
	136	196
	105	129
	99	83
	186	78
	172	177
	101	72
mean	132.6	122.4
Supplementary Figure S5G
Marble burying test
	Ctrl	cKO
	20	19
	18	20
	20	17
	18	19
	19	20
	20	17
	20	18
	16	16
	18	20
	16	16
mean	18.5	18.2
