# Supplementary material for: DIAPH3 deficiency links microtubules to mitotic errors, defective neurogenesis, and brain dysfunction
Source: eLife. 2021 Apr 26;10:e61974. doi: 10.7554/eLife.61974 (PMC8102060; doi:10.7554/eLife.61974)
Supplement: Figure 5—source data 1. [file elife-61974-fig5-data1.xlsx]

## Sheet: Figure 5
Figure 5
Figure 5B
Cortex thickness
	Ctrl	cKO
	1.5262	1.378
	1.5509	1.2441
	1.5288	1.3468
	1.586	1.31282
mean	1.54798	1.32043
Figure 5D
Cux1	number of cell
	728.125	638.125
	928.75	656.875
	1046.25	569.375
	1028.75	593.125
mean	932.969	614.375
Cux1	Layer thickness
	459.83	344.87
	495.19	403.95
	462.19	410.7
	511.25	381.56
mean	482.115	385.27
Figure 5F
Foxp2	number of cell
	515.625	413.125
	501.875	409.375
	570.625	321.875
	643.125	353.75
mean	557.812	374.531
Foxp2	Layer thickness
	502.07	425.56
	507.35	376.4
	484.89	397.69
	525.08	332.44
mean	504.847	383.023
Figure 5G
Open field test
	Ctrl	cKO
	11258	9181.56
	11133.6	8877.03
	13280.4	9638.08
	11496.8	9804.3
	11211.9	9725.36
	10358.6	7034.03
	8969.04	8108.45
	7259.48	7556.44
	9310.08	8776.69
	11656.5	7960.17
mean	10593.4	8666.21
Figure 5H
Elevated plus maze
	Ctrl	cKO
	1753.02	713.299
	1467.89	1236.99
	1314.7	1168.28
	1576.08	1625.02
	2111.18	1253.28
	1588.9	1226.89
	1758.52	1672.33
	1878.75	1281.14
	1831.57	1452.43
	1683.68	1598.81
mean	1696.43	1322.85
Figure 5I
	Ctrl				cKO
	Stranger 1	center	empty		Stranger 1	center	empty
	329.04	65.28	205.68		134.88	201.12	264.24
	385.92	55.68	87.36		354.24	96.96	144.96
	297.12	126.96	232.32		292.56	101.04	265.2
	245.76	85.2	254.64		163.68	61.68	368.16
	424.32	77.52	120.24		0	42.24	535.92
	311.52	72.24	203.28		244.56	67.92	271.68
	317.52	70.56	200.64		331.2	64.08	172.08
	479.76	80.64	45.36		179.04	83.52	359.04
	331.92	99.36	186.96		368.4	83.76	148.08
	303.36	127.2	169.2		514.8	85.2	0
mean	342.624	86.064	170.568		258.336	88.752	252.936
Figure 5J
	Ctrl				cKO
	Stranger1	center	Stranger 2		Stranger1	center	Stranger 2
	205.44	96.24	298.32		303.12	69.12	228
	152.4	75.36	357.36		224.4	112.08	268.32
	171.12	90.48	373.68		425.28	107.52	99.84
	300.48	91.92	182.64		200.4	77.76	237.12
	206.16	122.4	318.72		277.44	22.08	271.68
	136.56	37.92	371.76		262.08	161.76	170.4
	224.88	55.2	228		232.32	50.64	255.84
	314.16	90.48	246		370.56	99.84	151.44
	153.84	116.4	355.68		265.92	167.52	234.24
	152.16	69.12	378.48		147.36	222	230.64
mean	201.72	84.552	311.064		270.888	109.032	214.752
